# Supplementary material
Source: HighWire-hosted journal article supplement (https://gut.bmj.com/content/70/1/67)
Supplement: inline-supplementary-material-4 [file inline-supplementary-material-4.pdf]

**Supplementary Table S1. Subgroup analysis of indication (esophageal cancer and gastric neoplasm)**

|                                           | WLI group   |                  | 2G-NBI group   |               | P-value<br>(Primary WLI vs<br>Primary 2G-NBI) |
|-------------------------------------------|-------------|------------------|----------------|---------------|-----------------------------------------------|
|                                           | Primary WLI | Secondary 2G-NBI | Primary 2G-NBI | Secondary WLI |                                               |
| <b>Patients with esophageal cancer, n</b> | 385         |                  | 388            |               |                                               |
| Patient with EGC, n (%)                   | 3 (0.8)     | 1 (0.3)          | 2 (0.5)        | 2 (0.5)       | 0.686                                         |
| Target lesion, n                          | 39          | 16               | 26             | 11            |                                               |
| EGC, n                                    | 3           | 1                | 3              | 2             |                                               |
| Positive predictive value (%)             | 7.7         | 6.3              | 11.5           | 18.2          | 0.676                                         |
| <b>Patients with gastric neoplasm, n</b>  | 1873        |                  | 1877           |               |                                               |
| Patient with EGC, n (%)                   | 41 (2.2)    | 18 (1.0)         | 51 (2.7)       | 15 (0.8)      | 0.342                                         |
| Target lesion, n                          | 332         | 102              | 256            | 121           |                                               |
| EGC, n                                    | 47          | 18               | 56             | 15            |                                               |
| Positive predictive value (%)             | 14.2        | 17.6             | 21.9           | 12.4          | 0.016                                         |

WLI: white light imaging; 2G-NBI: second-generation narrow band imaging; EGC: early gastric cancer.
